# Supplementary material
Source: PubMed Central journal article supplement (PMC3328302)

Type of file: figure

Label: S1

Filename: HEP\_23143\_sm\_suppfig1.tif

Fig. S1

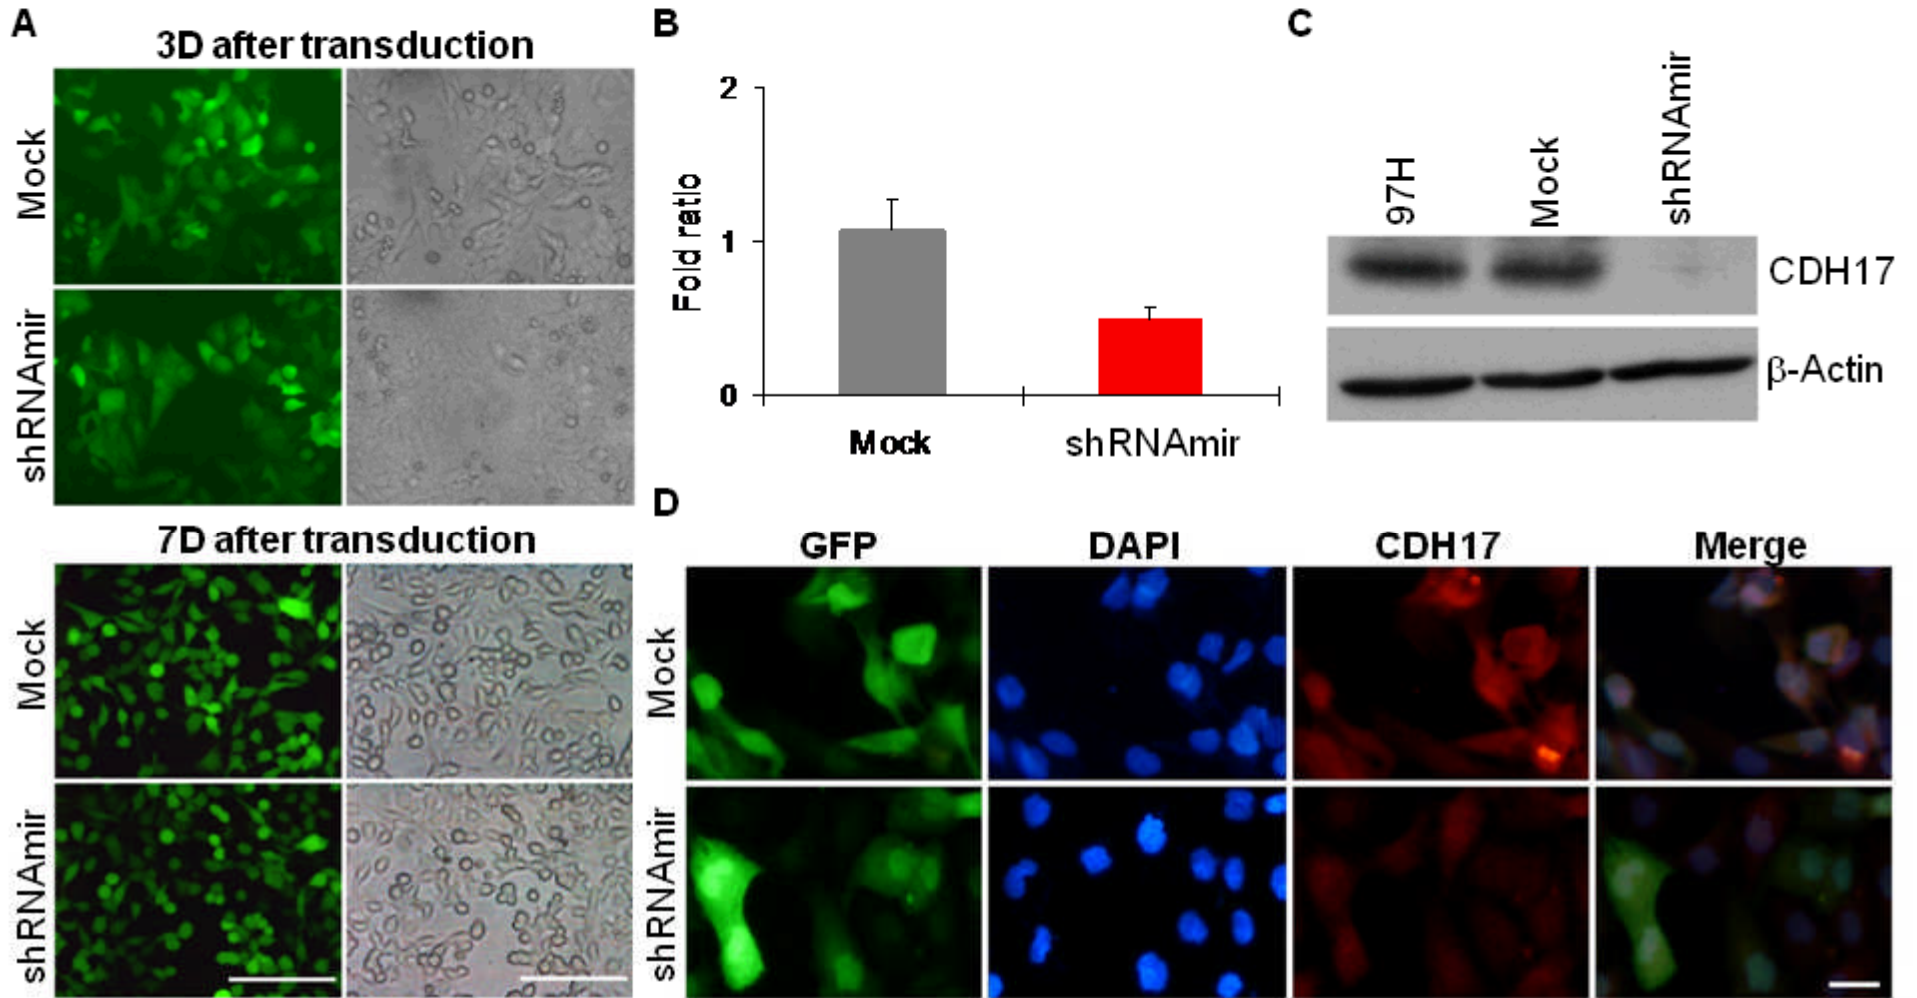

Type of file: figure

Label: S2

Filename: HEP\_23143\_sm\_suppfig2.tif

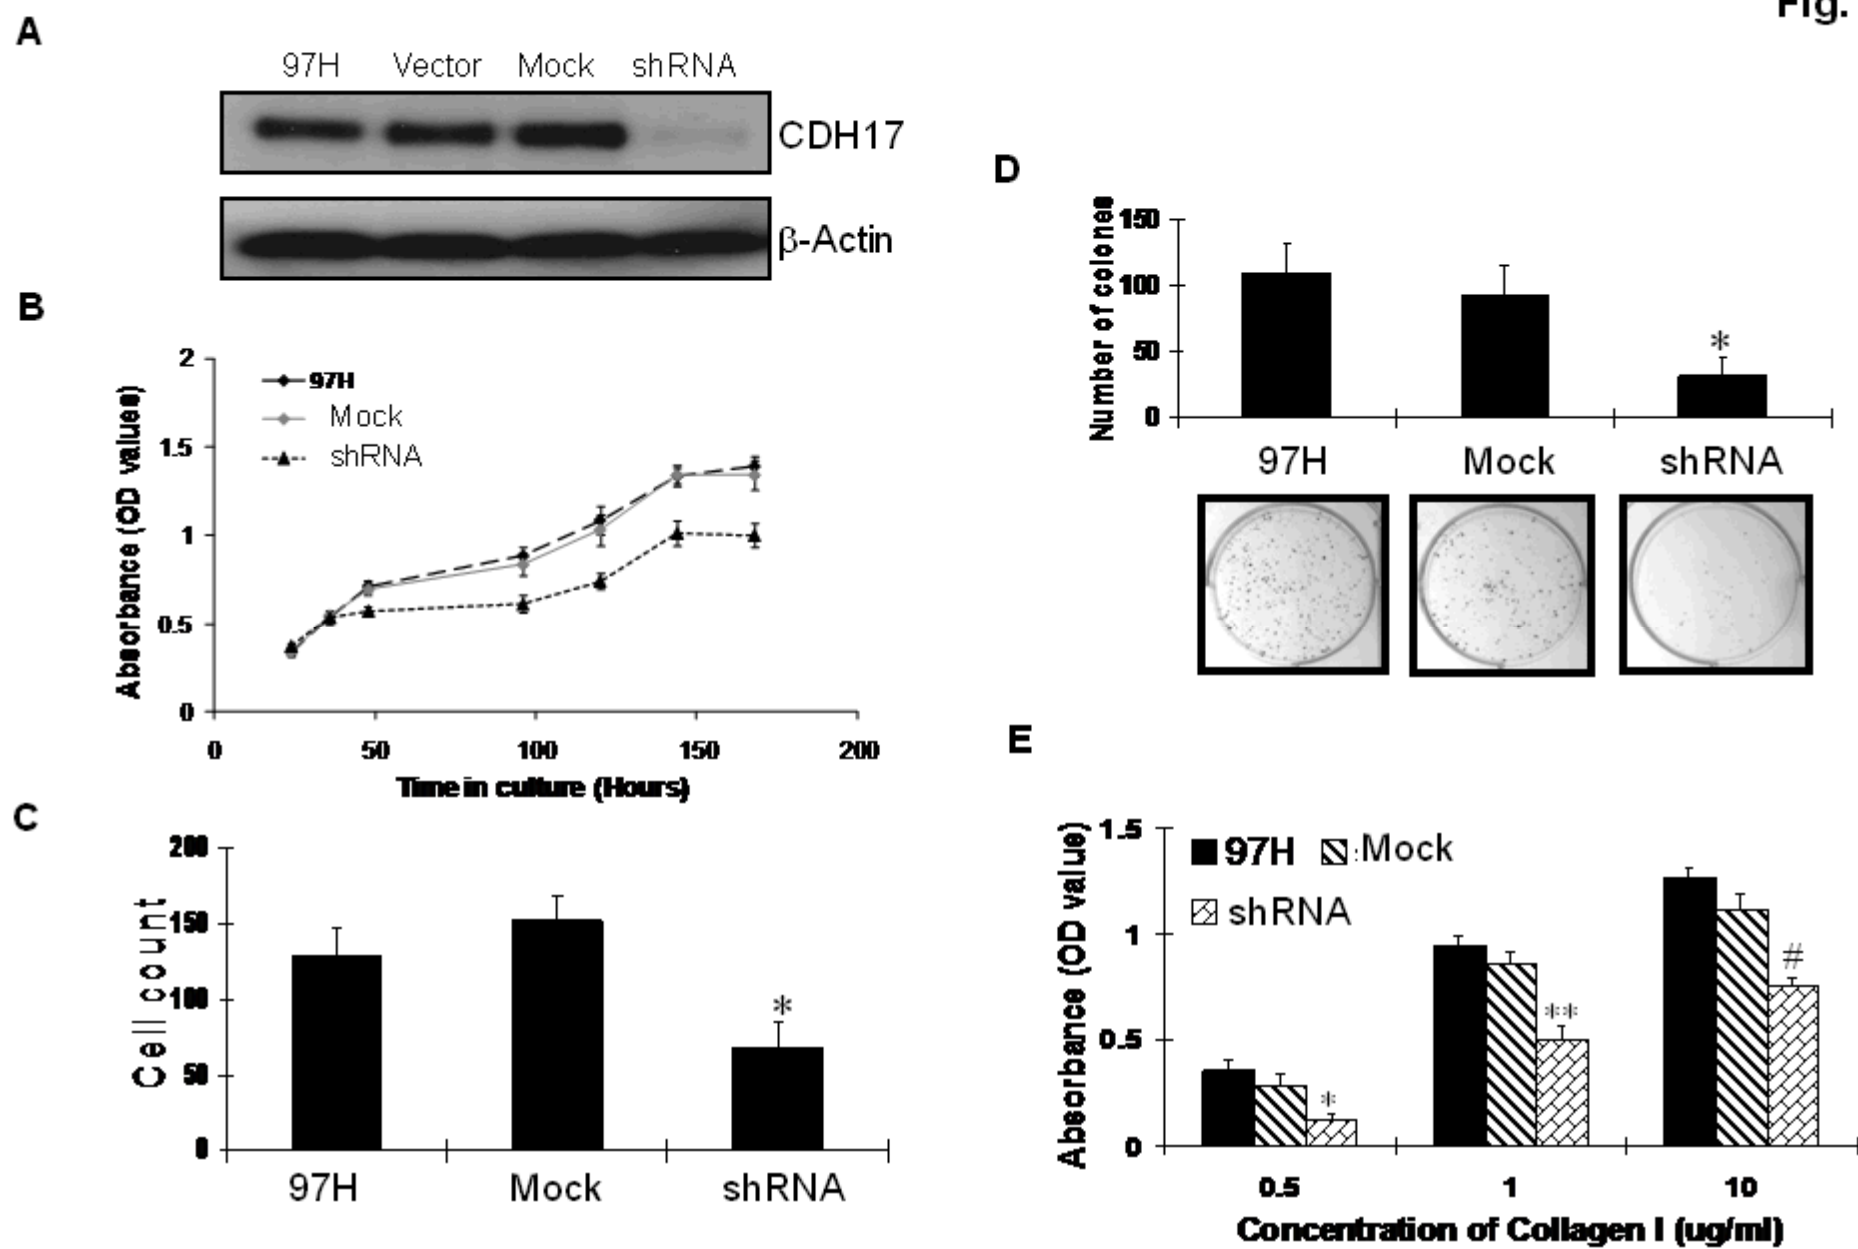

Type of file: figure

Label: S3

Filename: HEP\_23143\_sm\_suppfig3.tif

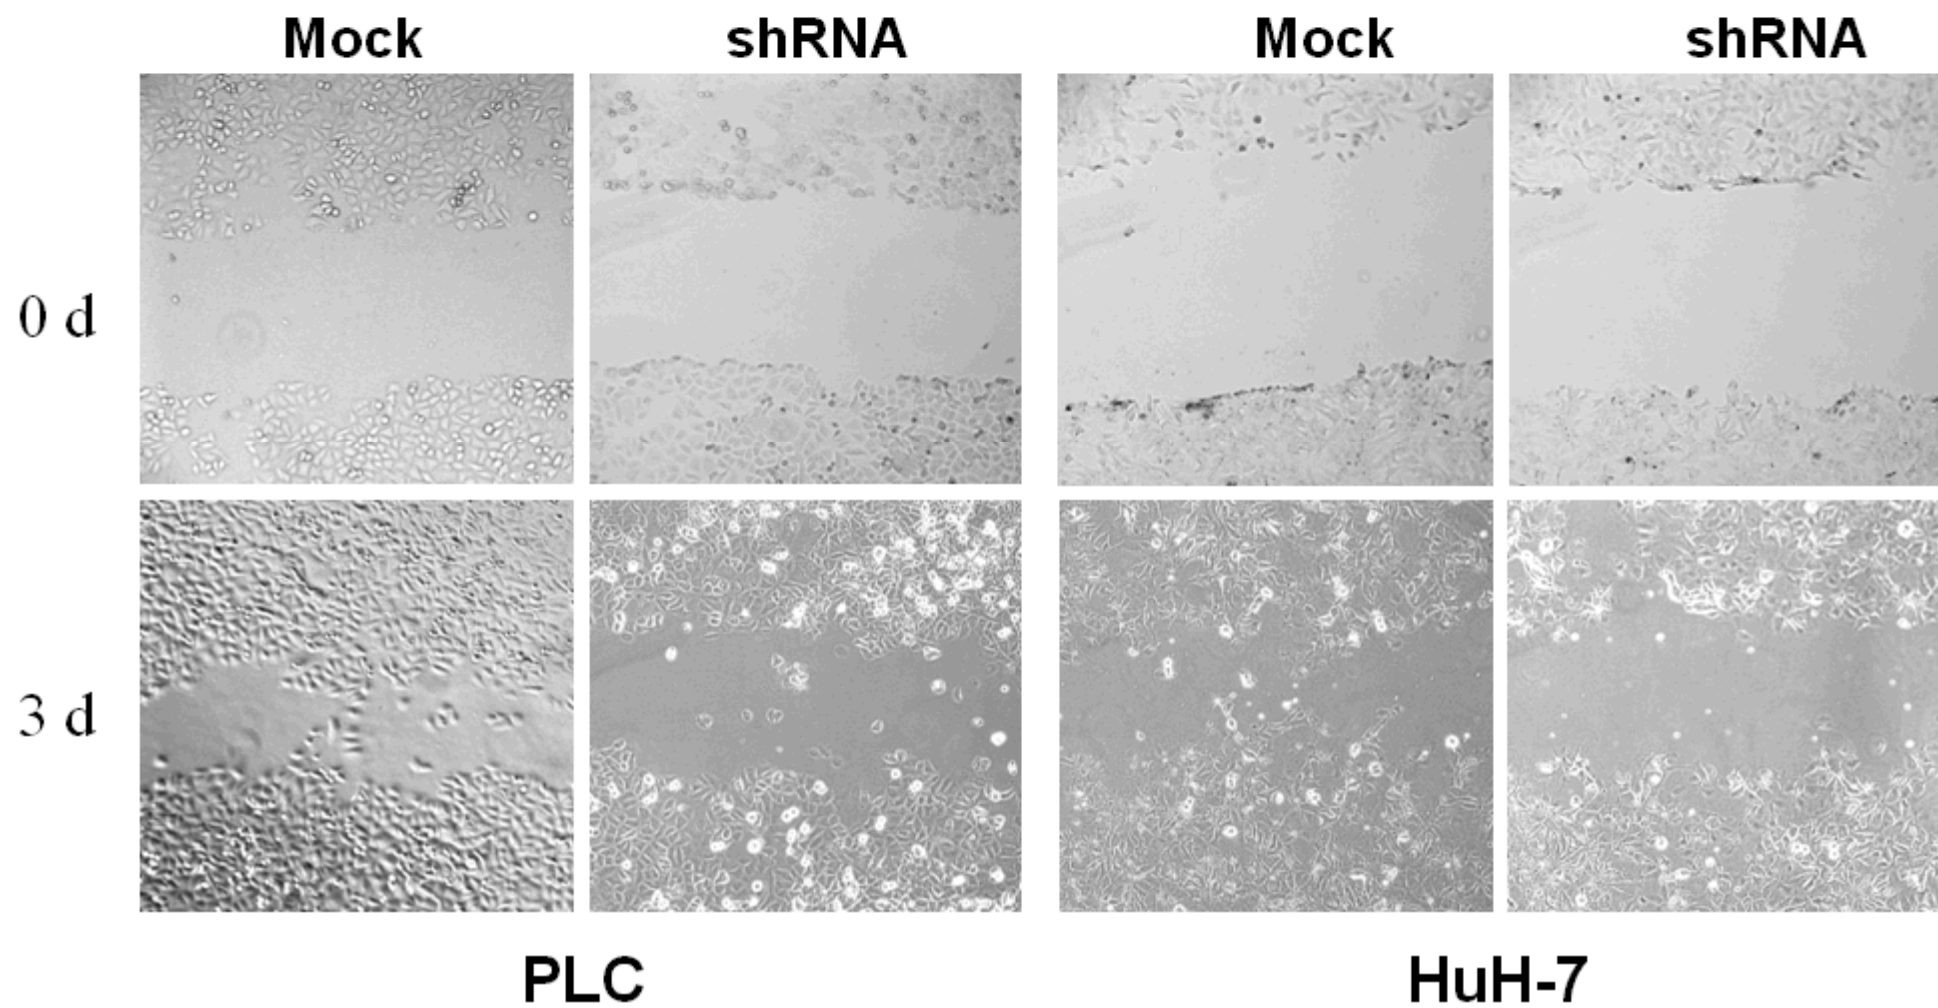

Type of file: figure

Label: S4

Filename: HEP\_23143\_sm\_suppfig4.tif

Fig. S4

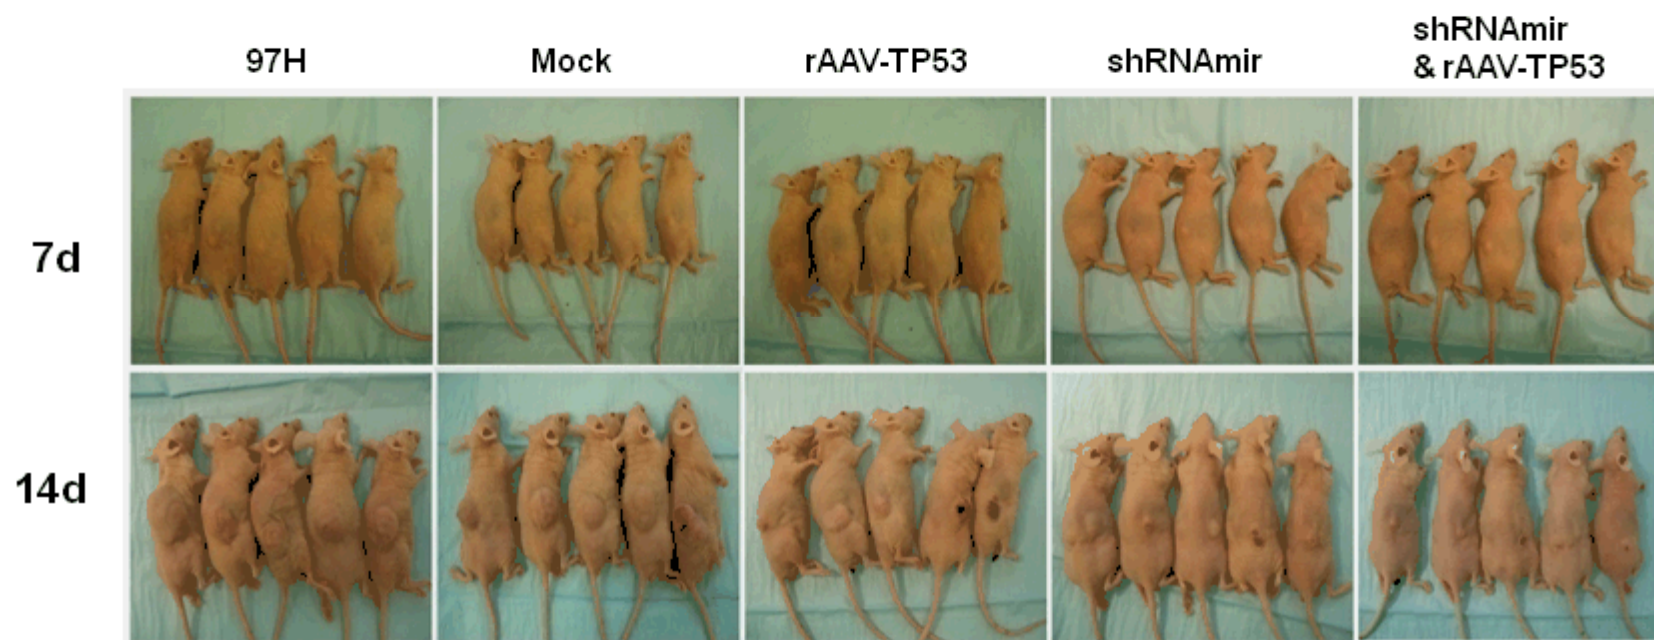



Type of file: figure

Label: S5

Filename: HEP\_23143\_sm\_suppfig5.tif

**Fig. S5**

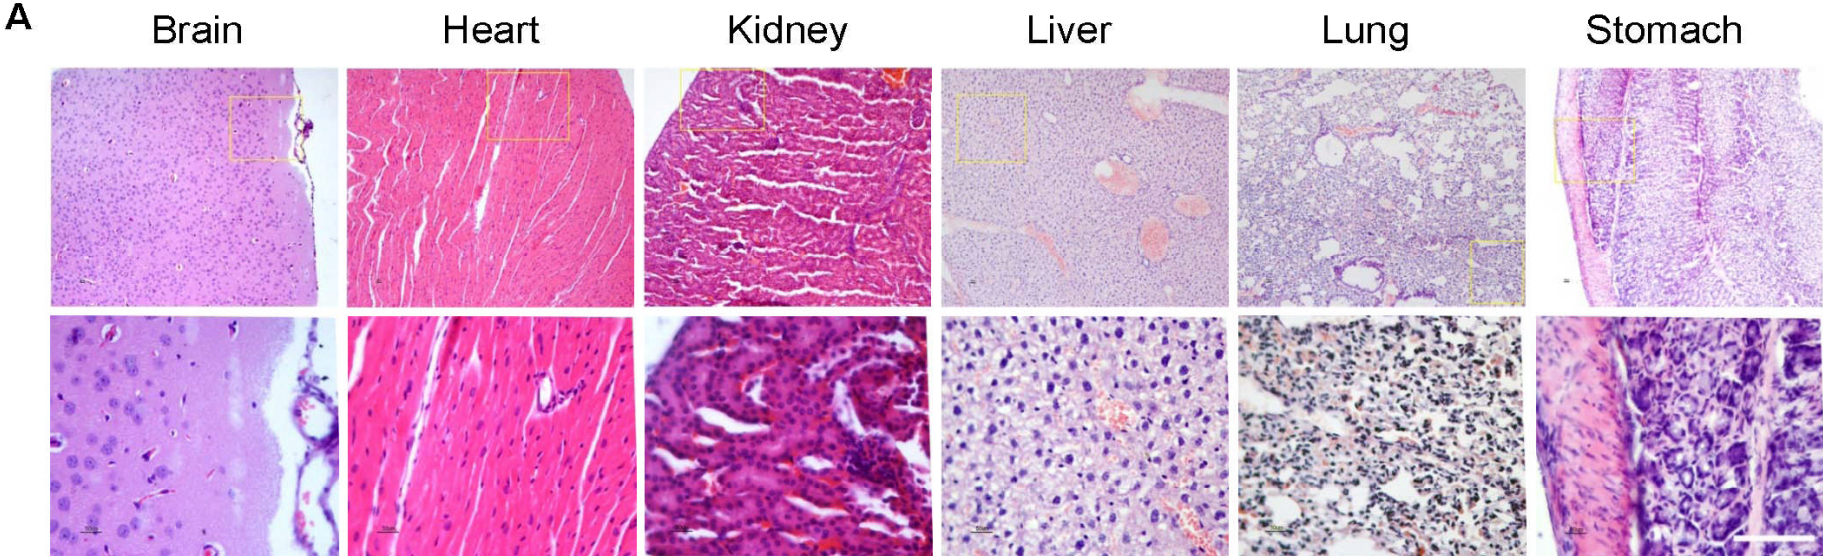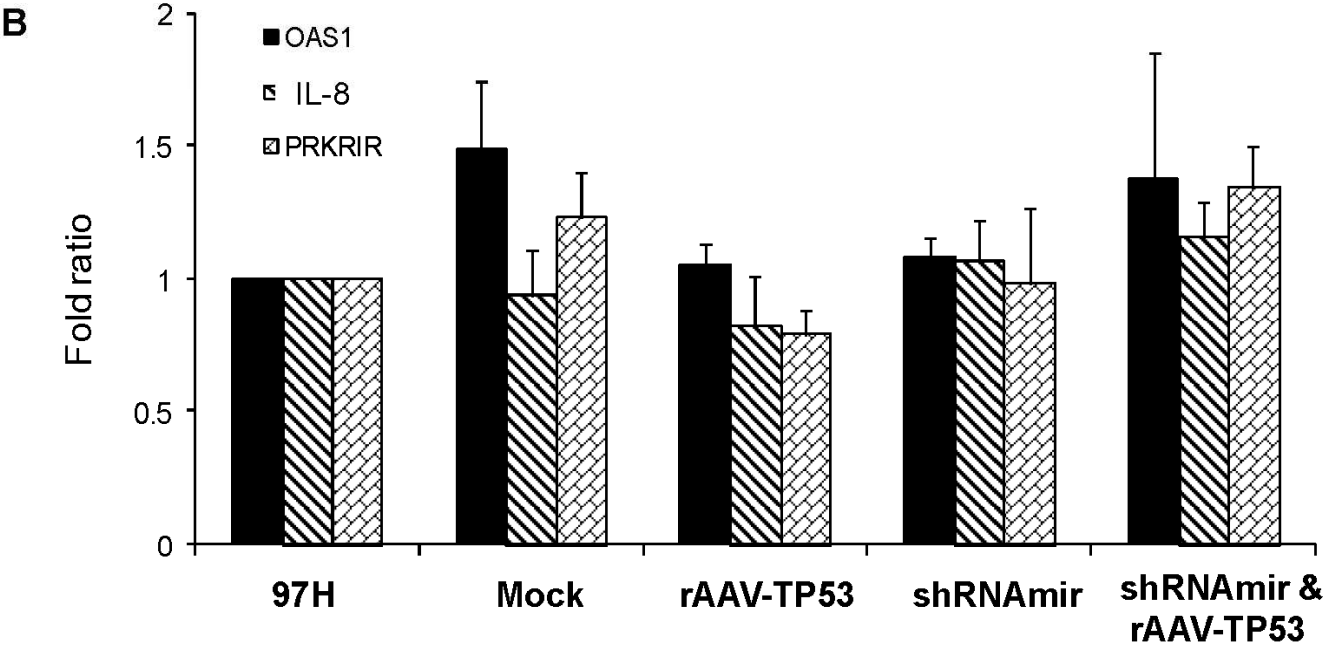

Supplement: NIHMS353854-supplement-02.pdf [file NIHMS353854-supplement-02.pdf]
